# Supplementary material for: The chemistry of the s- and p-block elements with 2,2′:6′,2′′-terpyridine ligands
Source: Royal Society of Chemistry journal article supplement (doi:10.1039/d3qi01245j), 2023-12-04
Supplement: d3qi01245j1.pdf [file d3qi01245j1.pdf]

## Supporting Information

### The Chemistry of the s- and p-Block Elements with 2,2':6',2''-Terpyridine Ligands

Andreas Winter,<sup>1,2,3</sup> George R. Newkome,<sup>4</sup> Ulrich S. Schubert<sup>1,2,3\*</sup>

<sup>1</sup> Laboratory of Organic and Macromolecular Chemistry (IOMC), Friedrich Schiller University Jena, Humboldtstr. 10, 07743 Jena, Germany

<sup>2</sup> Jena Center for Soft Matter (JCSM), Friedrich Schiller University Jena, Philosophenweg 7, 07743 Jena, Germany

<sup>3</sup> Center for Energy and Environmental Chemistry Jena (CEEC Jena), Philosophenweg 7a, 07743 Jena, Germany

<sup>4</sup> Center for Molecular Biology and Biotechnology, Florida Atlantic University, Jupiter Campus, 5353 Parkside Drive, Florida 33458, USA

#### Table of contents

|                                                                                                                                                                            |   |
|----------------------------------------------------------------------------------------------------------------------------------------------------------------------------|---|
| <i>Figure SI- 1.</i> Schematic representation of the various constitutional isomers from the terpyridine family, which could act as a tridentate ligand. _____             | 2 |
| <i>Figure SI- 2.</i> Schematic representation of the remaining angled constitutional isomers from the terpyridine family, which could not act as tridentate ligands. _____ | 3 |
| <i>Figure SI- 3.</i> Schematic representation of the various linear constitutional isomers from the terpyridine family. _____                                              | 4 |

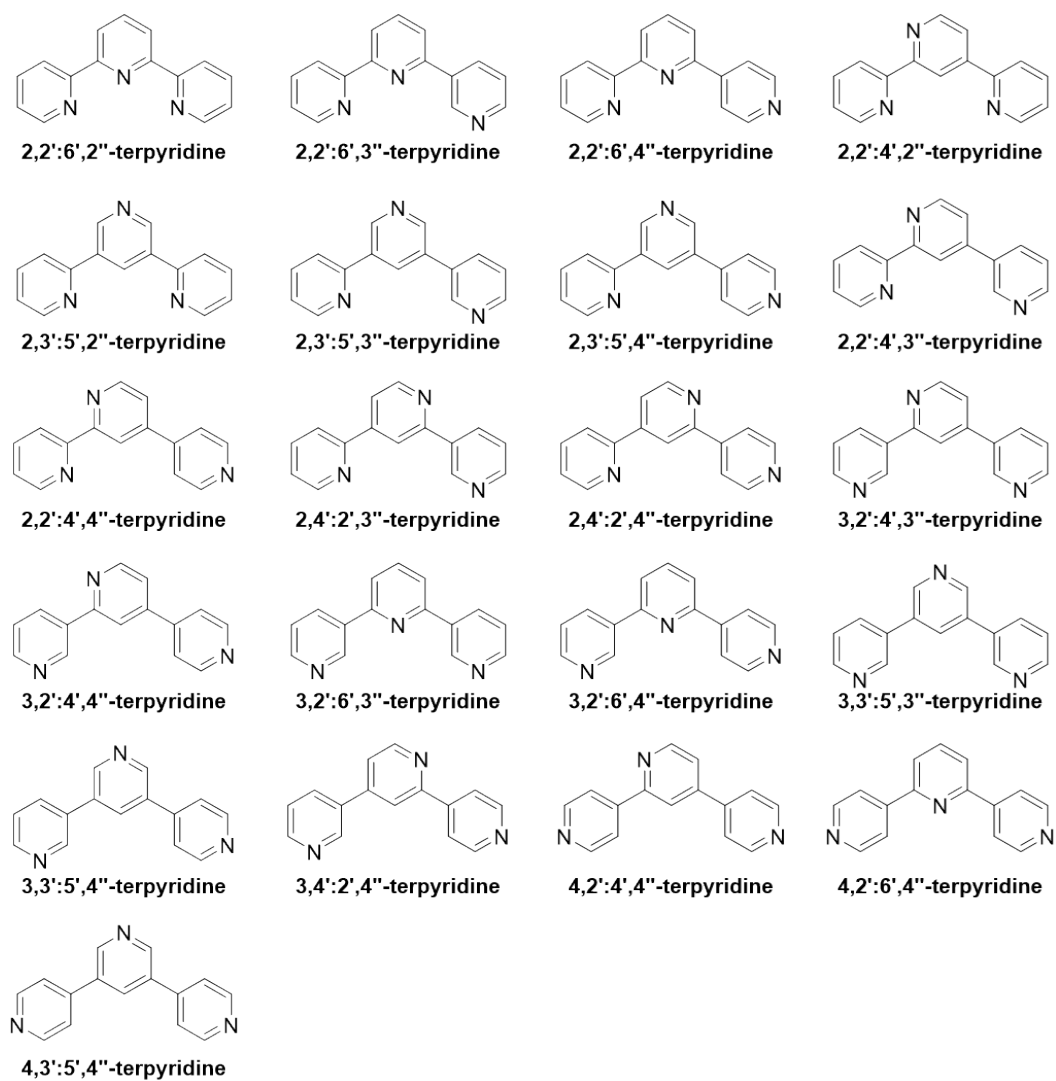

Figure SI- 1. Schematic representation of the various constitutional isomers from the terpyridine family, which could act as a tridentate ligand. Figure redrawn according to Constable *et al.*<sup>1</sup> and Klein *et al.*<sup>2</sup>

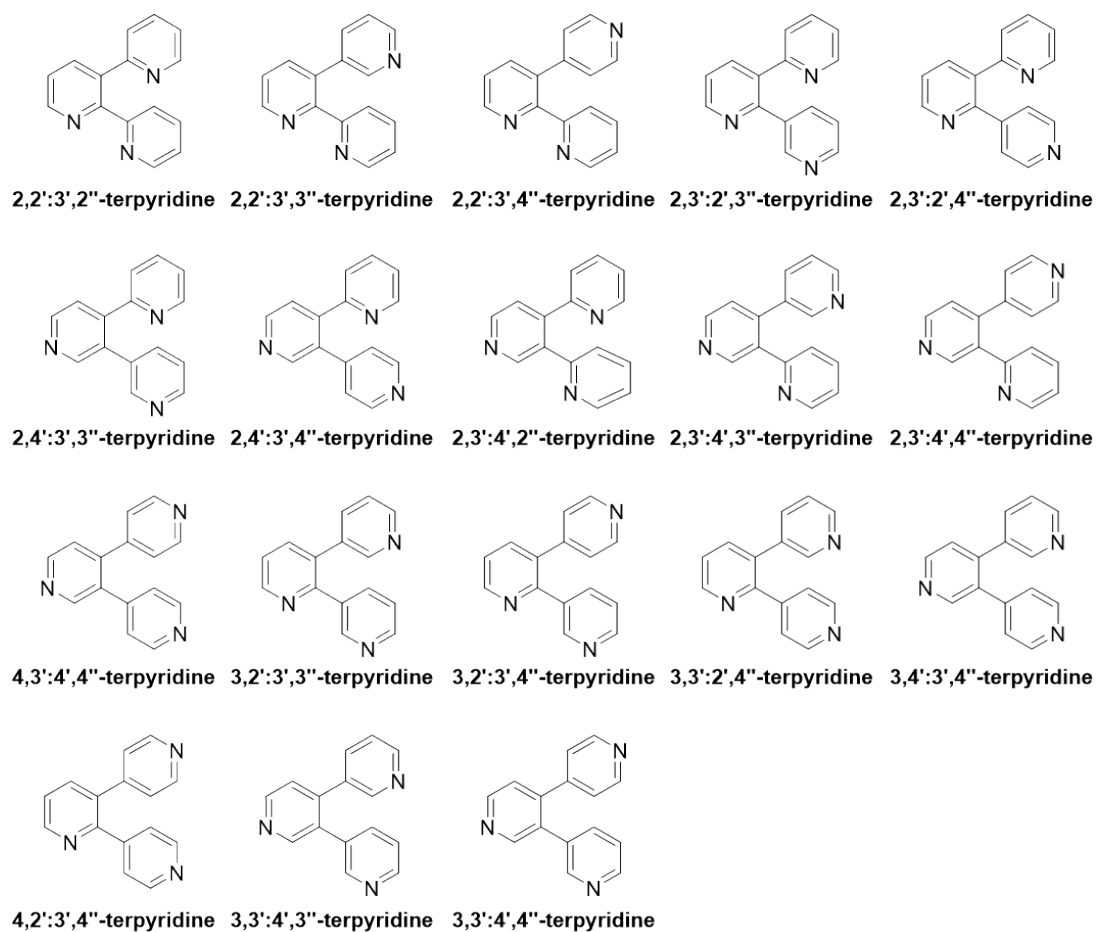

*Figure SI- 2.* Schematic representation of the remaining angled constitutional isomers from the terpyridine family, which could not act as tridentate ligands. Figure redrawn according to Constable *et al.*<sup>1</sup>

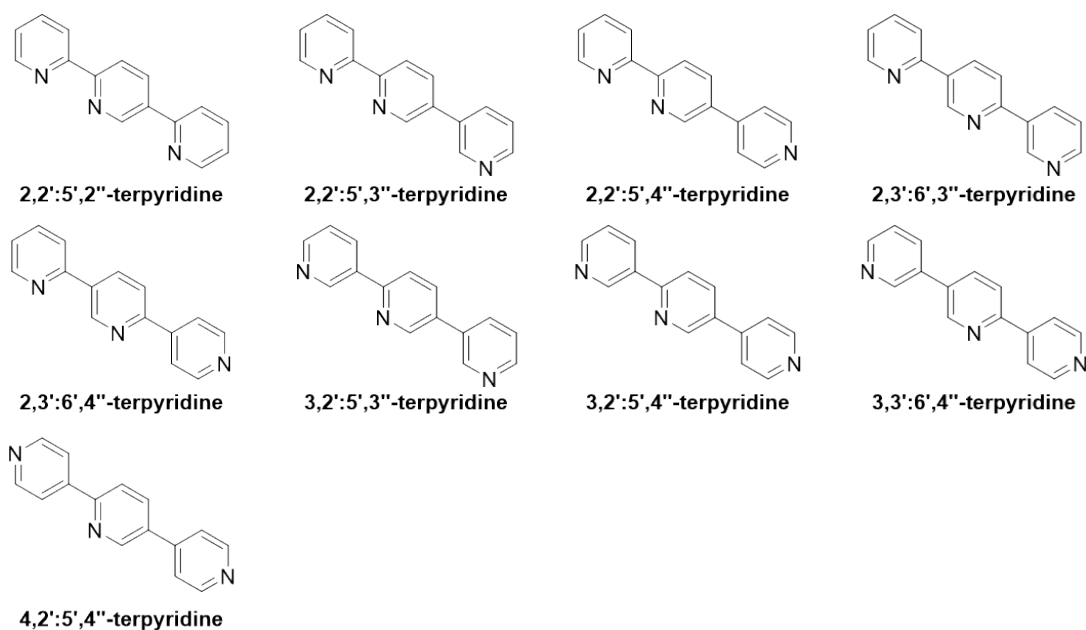

Figure SI- 3. Schematic representation of the various linear constitutional isomers from the terpyridine family. Figure redrawn according to Constable *et al.*<sup>1</sup>

## References

- (1) C. E. Housecroft and E. C. Constable: Isomers of terpyridine as ligands in coordination polymers and networks containing zinc(II) and cadmium(II). *Molecules* **2021**, *26*, 3110. DOI: 10.3390/molecules26113110
- (2) L. Payen, L. Kletsch, T. Lapić, M. Wickleder, and A. Klein: C-H Metalation of terpyridine stereoisomers with Ni(II), Pd(II), and Pt(II). *Inorganics* **2023**, *11*, 174. DOI: 10.3390/inorganics11040174
